# Supplementary material for: Surface selectivity of Ni3S2toward hydrogen evolution reaction: a first-principles study
Source: Royal Society of Chemistry journal article supplement (doi:10.1039/d0cp03845h), 2020-01-01
Supplement: d0cp03845h1.pdf [file d0cp03845h1.pdf]

## Electronic Supplementary Information

### Surface selectivity of Ni<sub>3</sub>S<sub>2</sub> toward hydrogen evolution reaction: a first-principles study

Bo Zhang<sup>a</sup>, Xiuli Fu<sup>a,\*</sup>, Li Song<sup>b</sup> and Xiaojun Wu<sup>c,\*</sup>

<sup>a</sup> State Key Laboratory of Information Photonics and Optical Communications, and School of Science, Beijing University of Posts and Telecommunications, Beijing 100876, P. R. China

<sup>b</sup> Univ Sci & Technol China, Natl Synchrotron Radiat Lab, CAS Ctr Excellence Nanosci, CAS Key Lab Strongly Coupled Quantum Matter Phys, Hefei 230029, Anhui, P. R. China

<sup>c</sup> Hefei National Laboratory for Physical Sciences at the Microscale, School of Chemistry and Materials Sciences, CAS Key Laboratory of Materials for Energy Conversion, CAS Center for Excellence in Nanoscience, University of Science and Technology of China, Hefei 230026, P. R. China

\*Corresponding author:

Xiuli Fu ([xiulifu@bupt.edu.cn](mailto:xiulifu@bupt.edu.cn), +86-10-62282242)

Xiaojun Wu ([xjwu@ustc.edu.cn](mailto:xjwu@ustc.edu.cn))

This work was supported by the National Natural Science Foundation of China (grant no. 11674035), and the Fund of State Key Laboratory of Information Photonics and Optical Communications (Beijing University of Posts and Telecommunications).

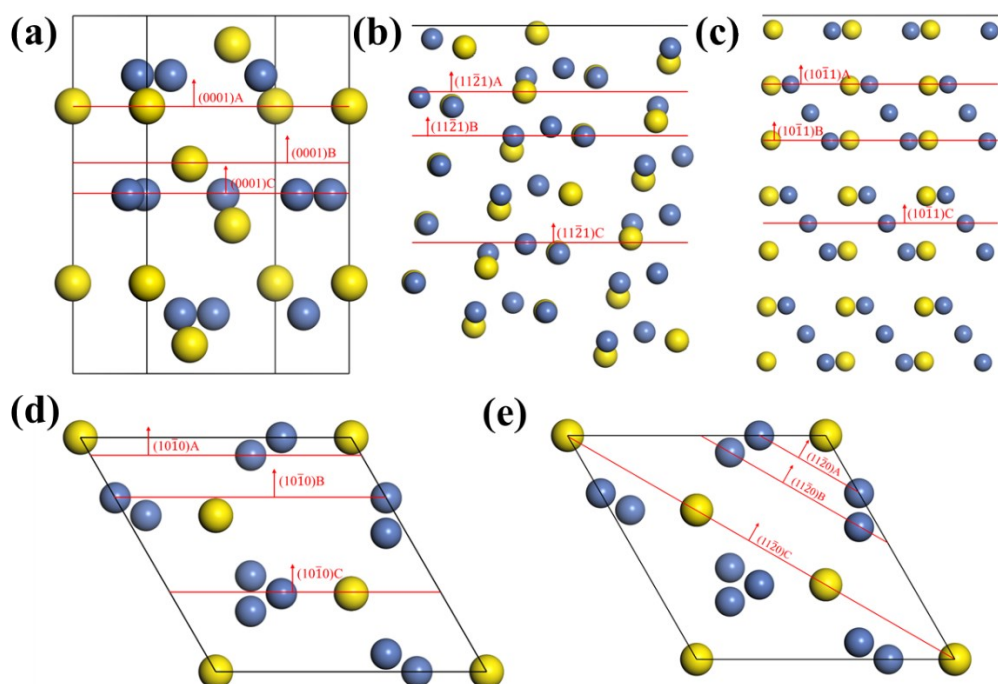

**Fig. S1** The (a) (0001), (b) (10 $\bar{1}$ 0), (c) (10 $\bar{1}$ 1), (d) (1120) and (e) (1121) planes with different terminations. These surfaces were selected for the calculation based on the consideration of symmetry of lattice. The surfaces with different terminations are denoted as A, B and C.

As shown in **Fig. S1**, in order to study the HER properties of different surfaces with different terminations, six relatively thermodynamically stable surfaces were selected based on the consideration of symmetry of low-index planes. To simplify the calculation process, all the considered surfaces are denoted as (0001)A, (0001)B, (0001)C of (0001) planes, (10 $\bar{1}$ 0)A, (10 $\bar{1}$ 0)B, (10 $\bar{1}$ 0)C of (10 $\bar{1}$ 0) planes, (10 $\bar{1}$ 1)A, (10 $\bar{1}$ 1)B, (10 $\bar{1}$ 1)C of (10 $\bar{1}$ 1) planes, (1120)A, (1120)B, (1120)C of (1120) planes, and (1121)A, (1121)B, (1121)C of (1121) planes.

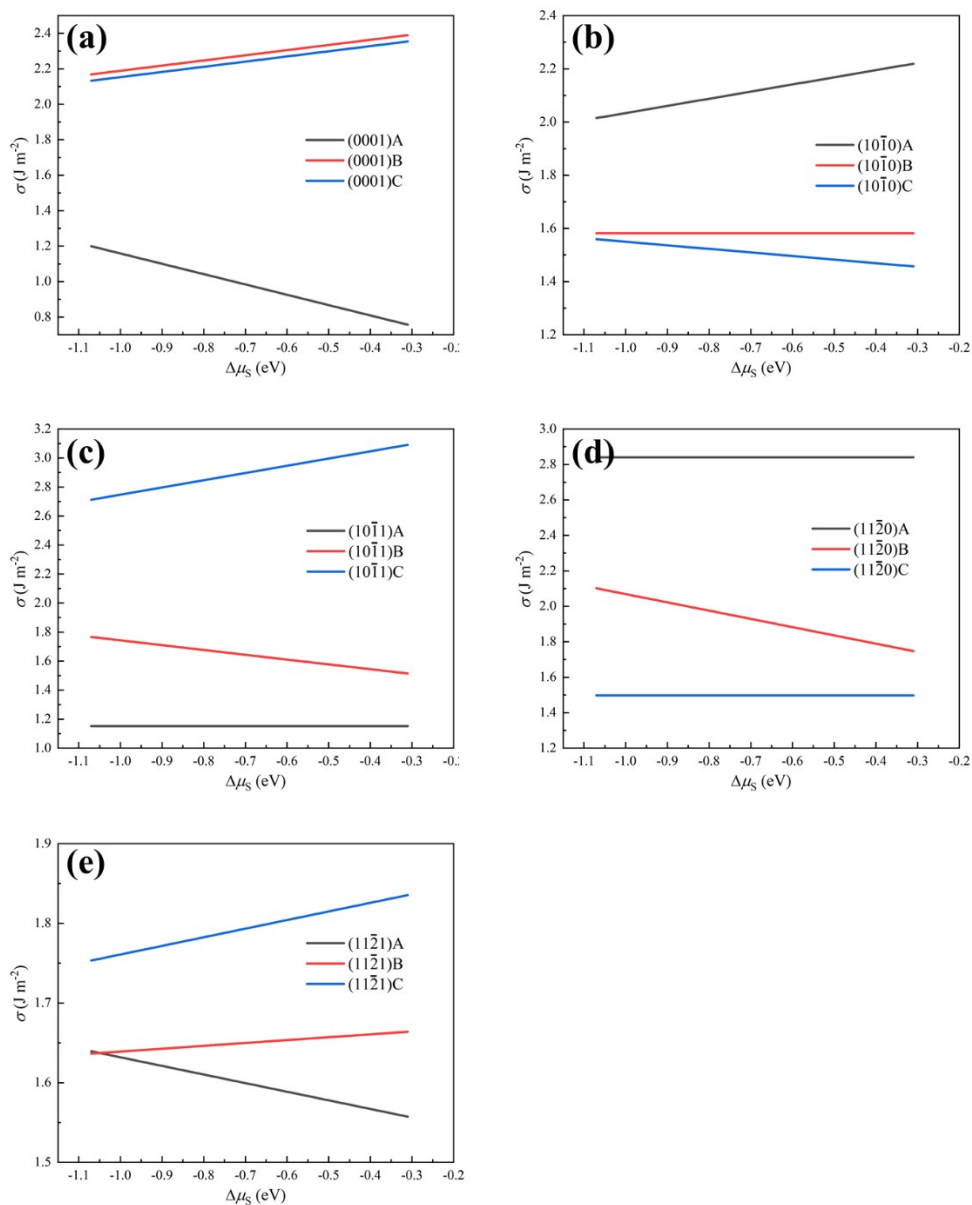

**Fig. S2** The surface energies of all the considered surfaces. (a)  $(0001)A$ ,  $(0001)B$  and  $(0001)C$  of  $(0001)$  planes. (b)  $(10\bar{1}0)A$ ,  $(10\bar{1}0)B$  and  $(10\bar{1}0)C$  of  $(10\bar{1}0)$  planes. (c)  $(10\bar{1}1)A$ ,  $(10\bar{1}1)B$  and  $(10\bar{1}1)C$  of  $(10\bar{1}1)$  planes. (d)  $(11\bar{2}0)A$ ,  $(11\bar{2}0)B$  and  $(11\bar{2}0)C$  of  $(11\bar{2}0)$  planes. (e)  $(11\bar{2}1)A$ ,  $(11\bar{2}1)B$  and  $(11\bar{2}1)C$  of  $(11\bar{2}1)$  planes. A, B and C indicate the surface terminated with different atoms.

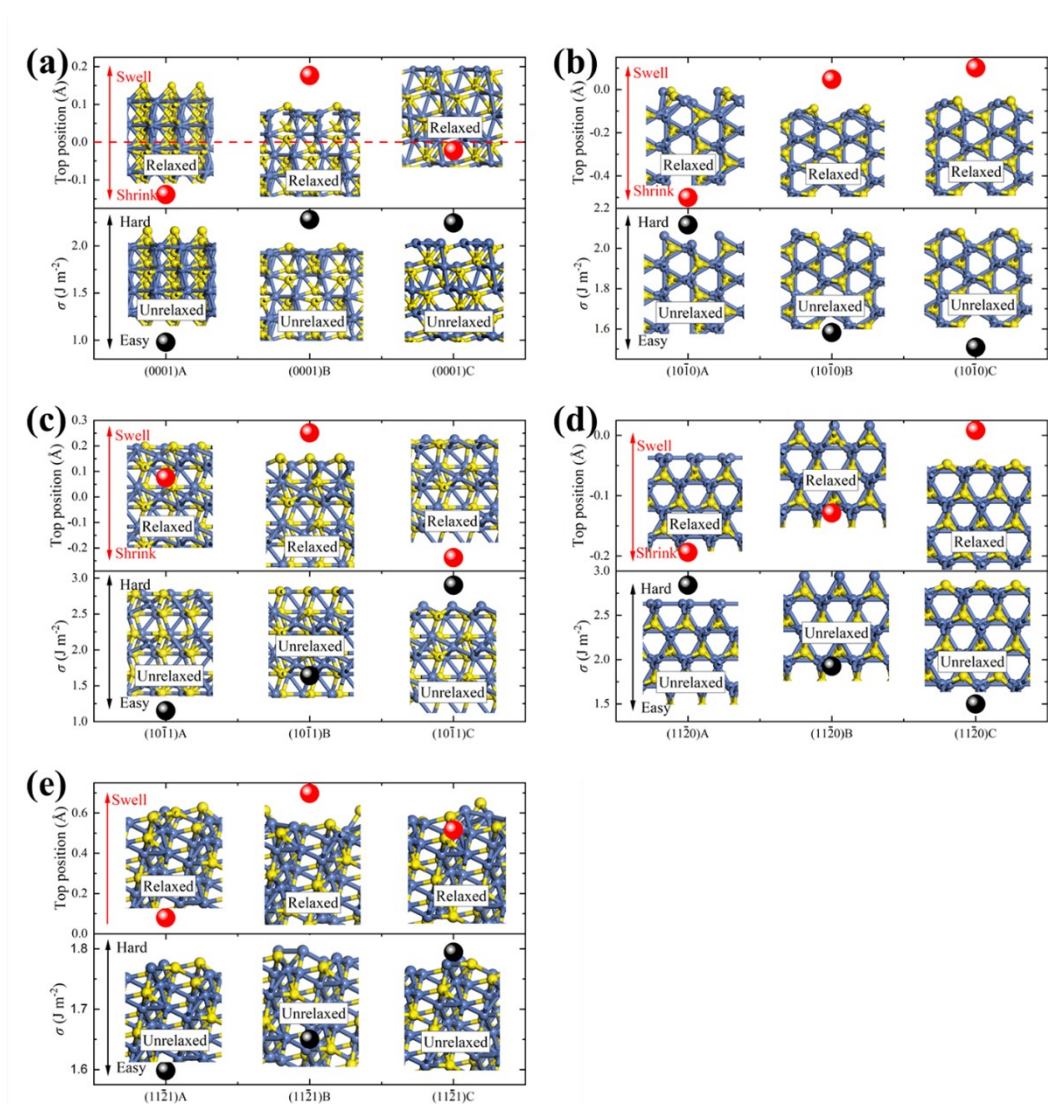

**Fig. S3** The changes of the top position of the fifteen stable surfaces and the corresponding surface energies at  $\Delta\mu_S = -0.69 \text{ eV}$ . The side views of relaxed and unrelaxed slabs models are also shown.

Yellow and blue spheres in ball-and-stick models stand for S and Ni atoms.

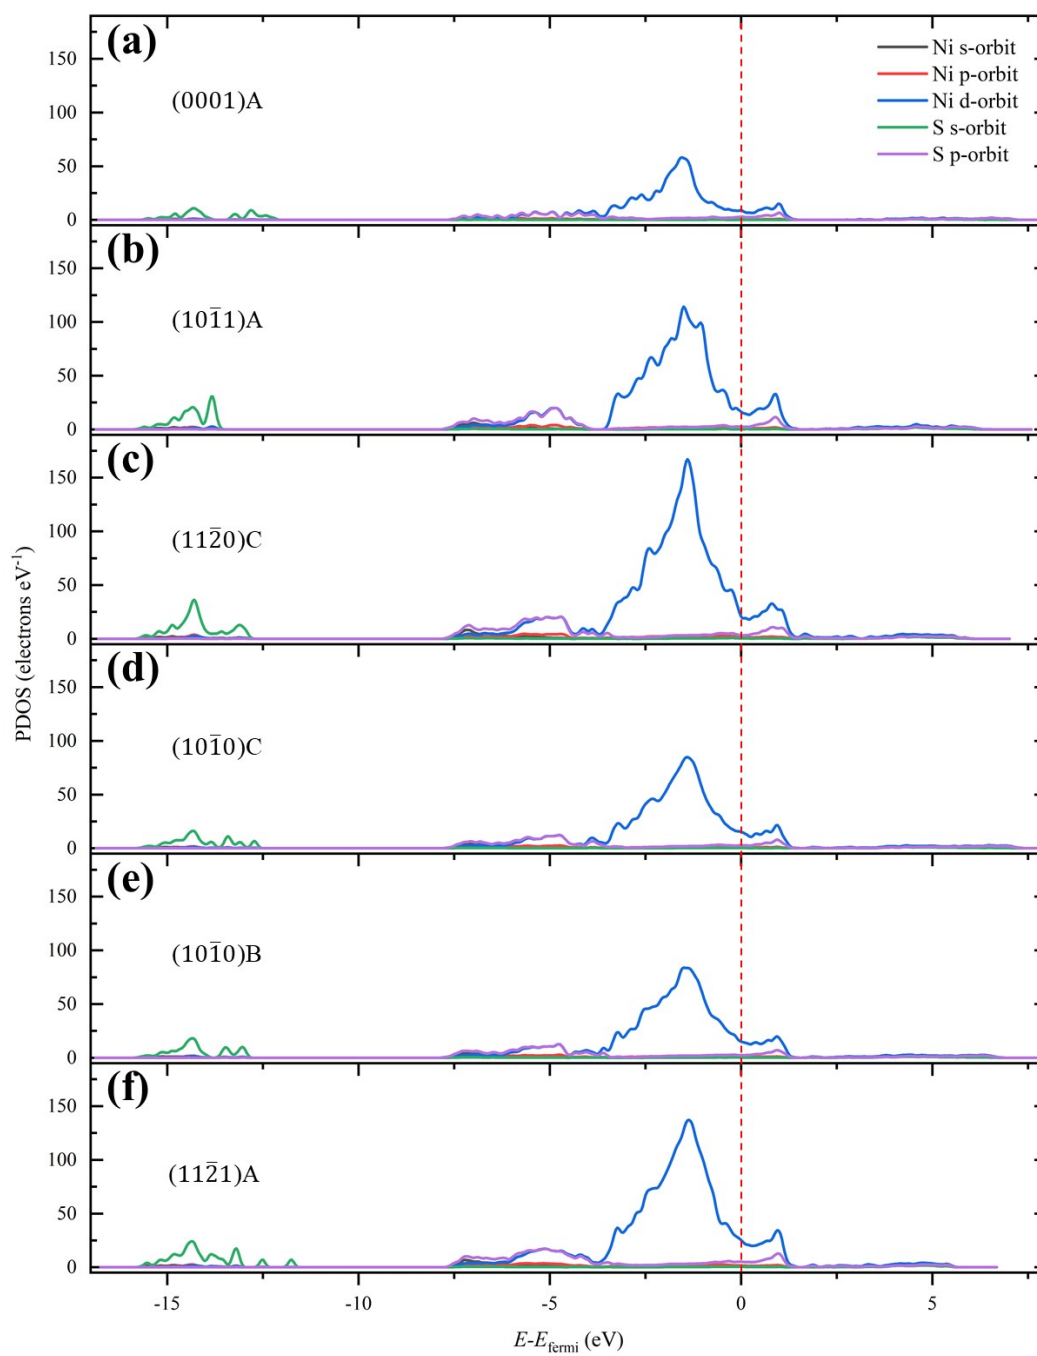

**Fig. S4** The PDOS of (a) (0001)A, (b) (10 $\bar{1}1$ )A, (c) (11 $\bar{2}0$ )C, (d) (10 $\bar{1}0$ )C, (e) (10 $\bar{1}0$ )B and (f) (11 $\bar{2}1$ )A surfaces of Ni<sub>3</sub>S<sub>2</sub>.

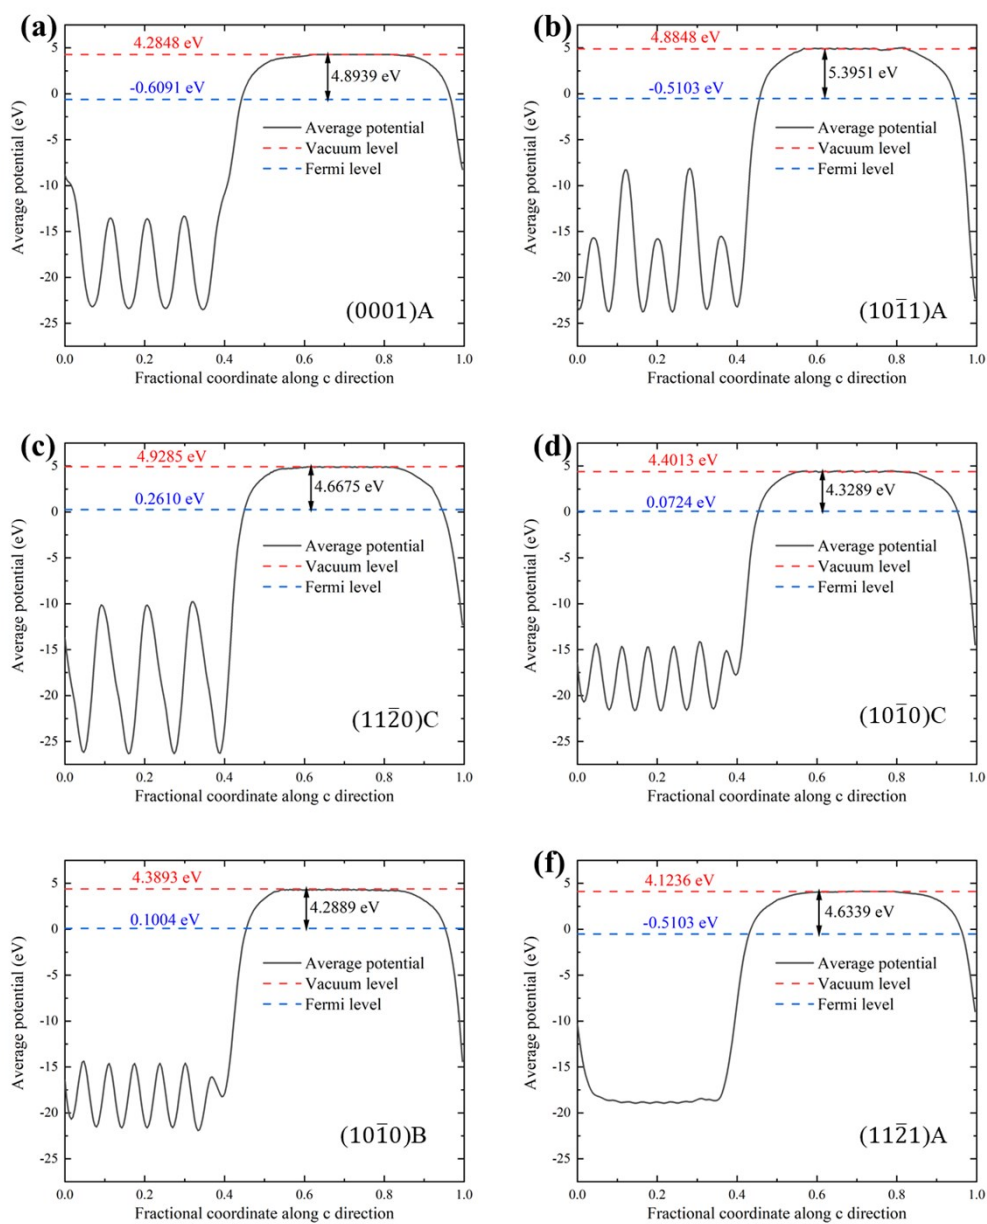

**Fig. S5** The work functions of different surfaces of  $\text{Ni}_3\text{S}_2$ . (a)  $(0001)\text{A}$ , (b)  $(10\bar{1}1)\text{A}$ , (c)  $(11\bar{2}0)\text{C}$ , (d)  $(10\bar{1}0)\text{C}$ , (e)  $(10\bar{1}0)\text{B}$  and (f)  $(11\bar{2}1)\text{A}$  surfaces.

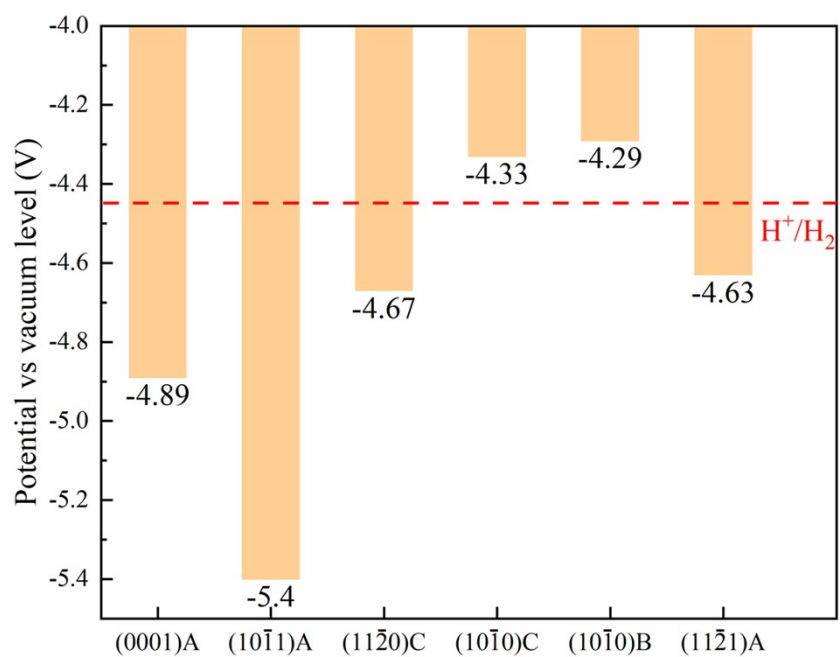

**Fig. S6** The potential difference between surfaces of  $\text{Ni}_3\text{S}_2$  and HER, including (0001)A, (1011)A, (1120)C, (1010)C, (1010)B and (1121)A surfaces.<sup>1</sup>



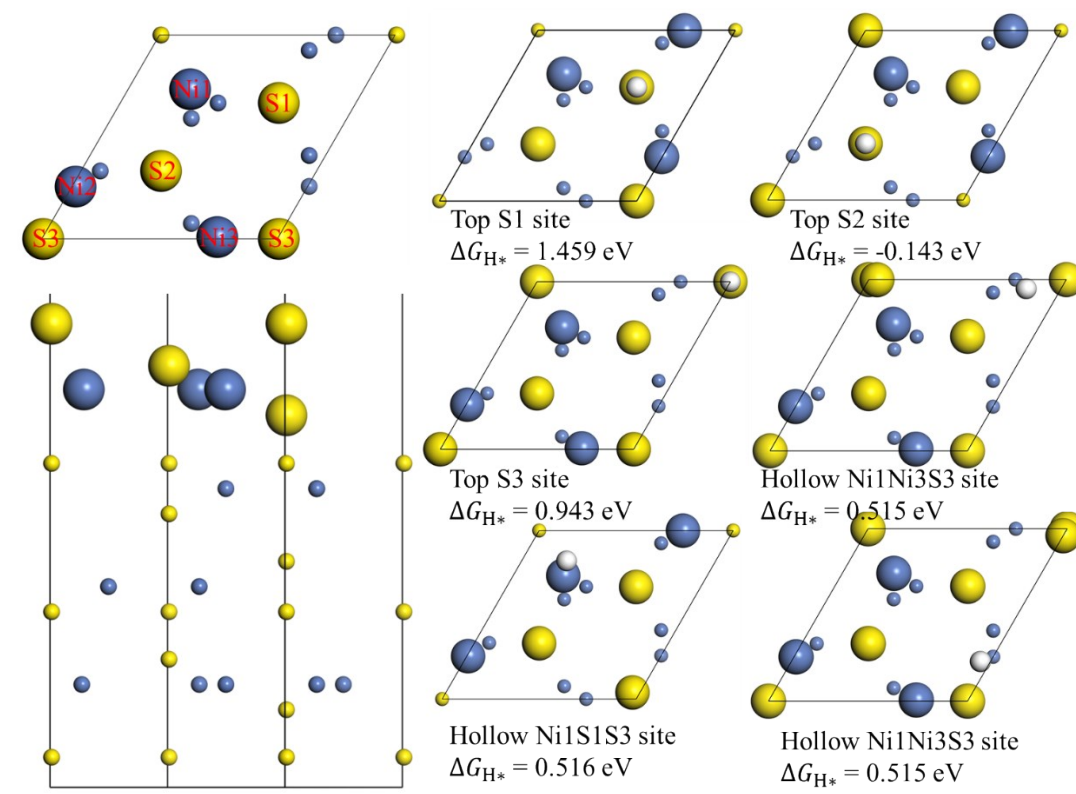

Fig. S7 The details of sites information of (0001)A of  $\text{Ni}_3\text{S}_2$ .



**Table S1** The details of Volmer-Heyrovsky process of (0001)A of Ni<sub>3</sub>S<sub>2</sub>.

| Site before relaxation | Site after relaxation | $\Delta G_{H^*}$ (eV) |
|------------------------|-----------------------|-----------------------|
| Top S1                 | Top S1                | 1.45933               |
| Top S2                 | Top S2                | -0.14256              |
| Top S3                 | Top S3                | 0.94331               |
| Top Ni3                | Hollow Ni1Ni3S3       | 0.51595               |
| Top Ni1                | Hollow Ni1S1S3        | 0.51613               |
| Top Ni2                | Hollow Ni2Ni3S3       | 0.51599               |

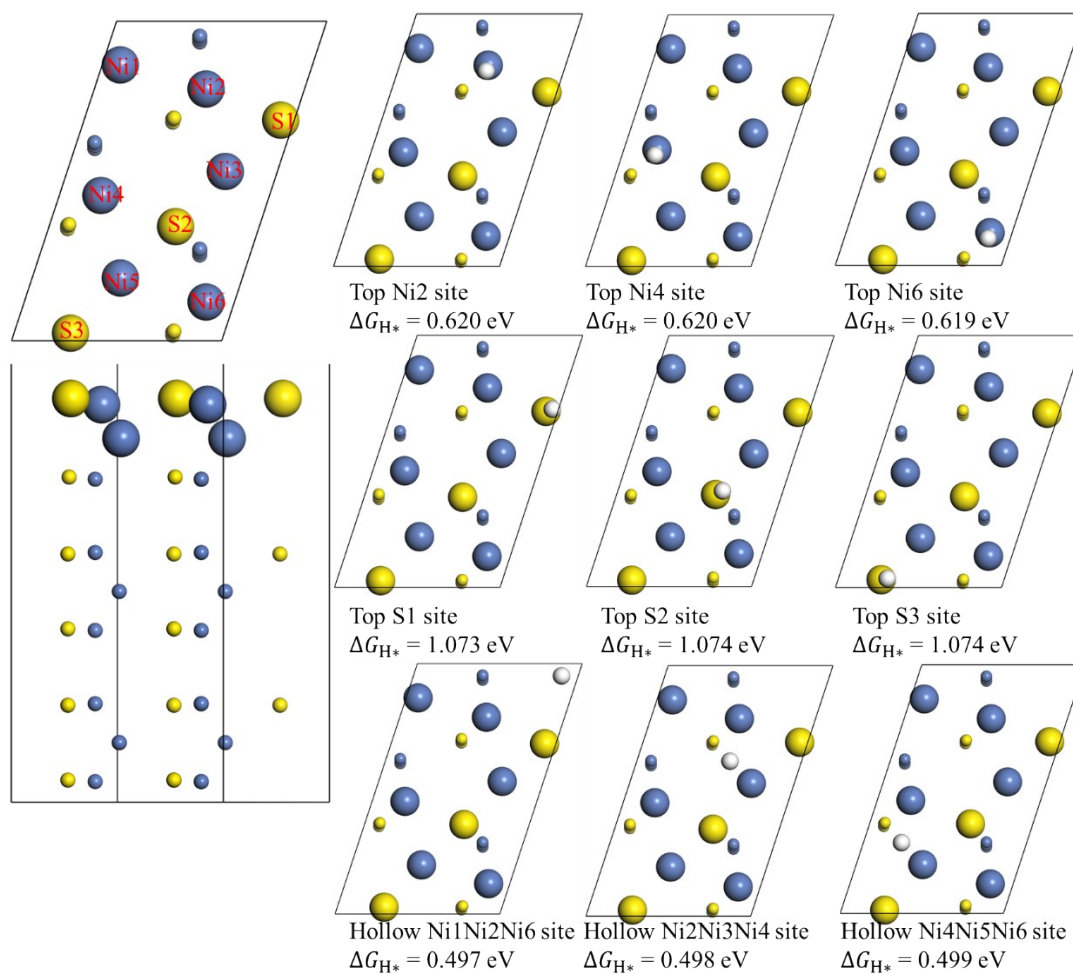

Fig. S8 The details of sites information of  $(10\bar{1}1)A$  of  $Ni_3S_2$ .

**Table S2** The details of Volmer-Heyrovsky process of (10 $\bar{1}$ 1)A of Ni<sub>3</sub>S<sub>2</sub>.

| Site before relaxation | Site after relaxation | $\Delta G_{H^*}$ (eV) |
|------------------------|-----------------------|-----------------------|
| Top Ni2                | Top Ni2               | 0.61978               |
| Top Ni4                | Top Ni4               | 0.61974               |
| Top Ni6                | Top Ni6               | 0.61923               |
| Top S1                 | Top S1                | 1.07367               |
| Top S2                 | Top S2                | 1.07413               |
| Top S3                 | Top S3                | 1.07413               |
| Top Ni1                | Hollow Ni1Ni2Ni6      | 0.49780               |
| Top Ni3                | Hollow Ni2Ni3Ni4      | 0.49807               |
| Top Ni5                | Hollow Ni4Ni5Ni6      | 0.49854               |

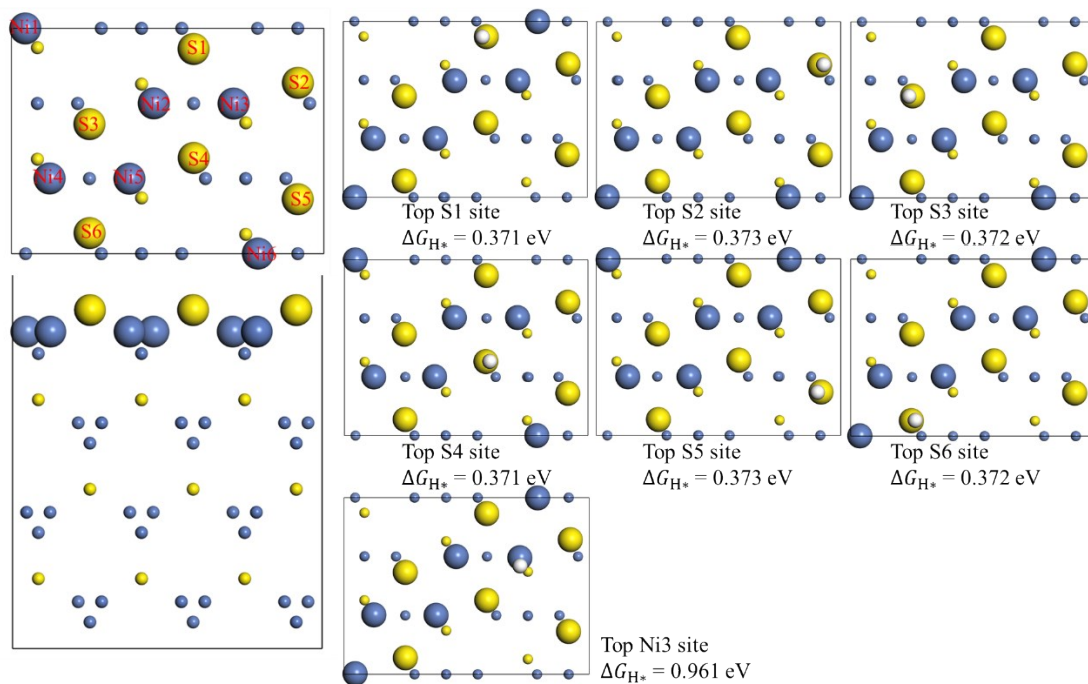

Fig. S9 The details of sites information of  $(11\bar{2}0)C$  of  $Ni_3S_2$ .

**Table S3** The details of Volmer-Heyrovsky process of (1120)C of Ni<sub>3</sub>S<sub>2</sub>.

| Site before relaxation | Site after relaxation | $\Delta G_{H^*}$ (eV) |
|------------------------|-----------------------|-----------------------|
| Top Ni3                | Top Ni3               | 0.96081               |
| Top S1                 | Top S1                | 0.37126               |
| Top S2                 | Top S2                | 0.37269               |
| Top S3                 | Top S3                | 0.37194               |
| Top S4                 | Top S4                | 0.37148               |
| Top S5                 | Top S5                | 0.37269               |
| Top S6                 | Top S6                | 0.37178               |

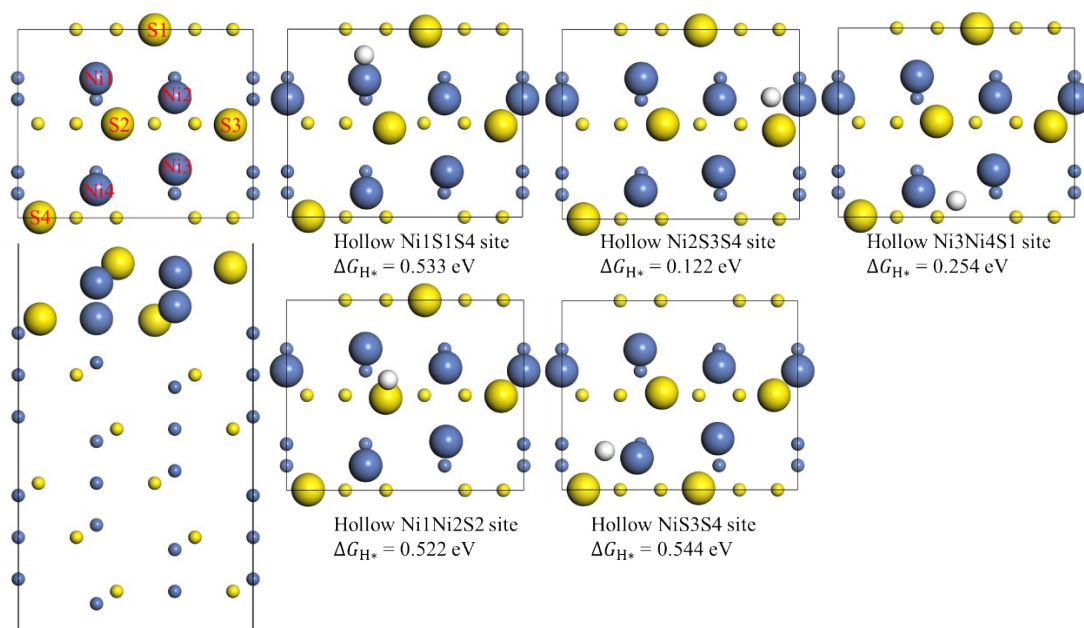

**Fig. S10** The details of sites information of  $(10\bar{1}0)_C$  of  $\text{Ni}_3\text{S}_2$ .

**Table S4** The details of Volmer-Heyrovsky process of (10 $\bar{1}$ 0)C of Ni<sub>3</sub>S<sub>2</sub>.

| Site before relaxation | Site after relaxation | $\Delta G_{H^*}$ (eV) |
|------------------------|-----------------------|-----------------------|
| <b>Top S2</b>          | Hollow Ni1Ni2S2       | 0.52232               |
| <b>Top Ni1</b>         | Hollow Ni1S1S4        | 0.53318               |
| <b>Top Ni2</b>         | Hollow Ni2S3S4        | 0.12247               |
| <b>Top Ni3</b>         | Hollow Ni3Ni4S1       | 0.25360               |
| <b>Top S4</b>          | Hollow Ni4S3S4        | 0.54435               |



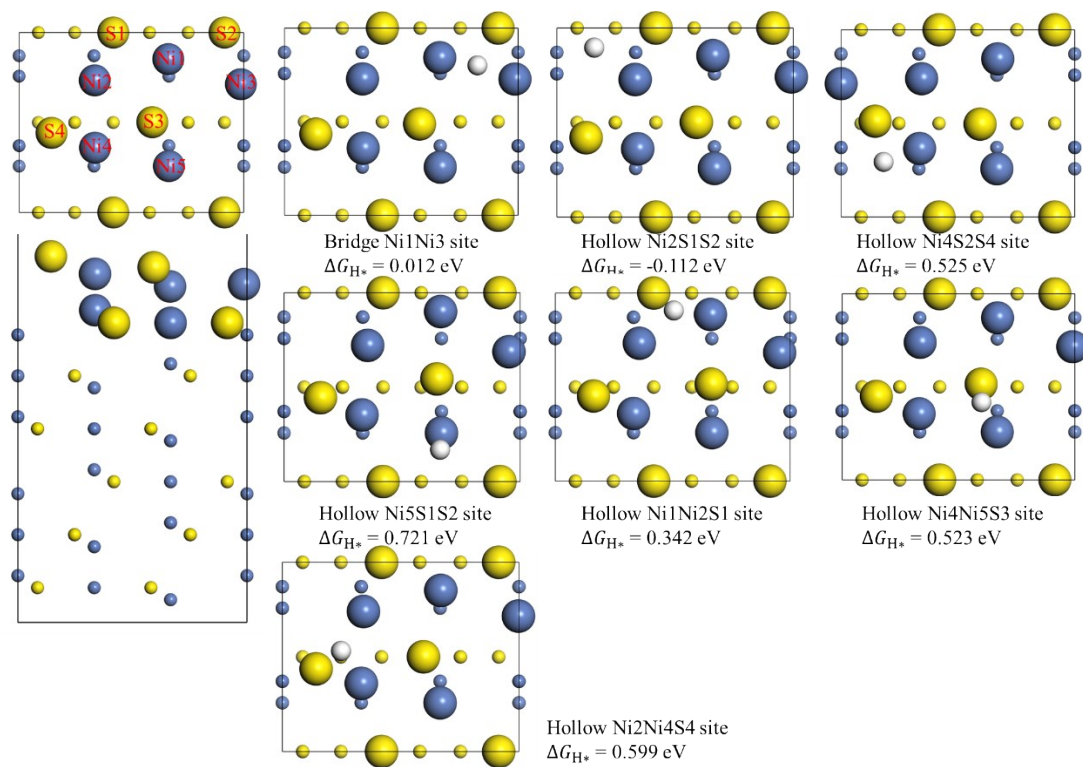

**Fig. S11** The details of sites information of  $(10\bar{1}0)B$  of  $Ni_3S_2$ .

**Table S5** The details of Volmer-Heyrovsky process of (10 $\bar{1}$ 0)B of Ni<sub>3</sub>S<sub>2</sub>.

| Site before relaxation | Site after relaxation | $\Delta G_{H^*}$ (eV) |
|------------------------|-----------------------|-----------------------|
| Top Ni1                | Bridge Ni1Ni3         | 0.01249               |
| Top S1                 | Hollow Ni1Ni2S1       | 0.34238               |
| Top S4                 | Hollow Ni2Ni4S4       | 0.59894               |
| Top Ni2                | Hollow Ni2S1S2        | -0.11155              |
| Top S3                 | Hollow Ni4Ni5S3       | 0.52396               |
| Top Ni4                | Hollow Ni4S2S4        | 0.52533               |
| Top Ni5                | Hollow Ni5S1S2        | 0.72123               |

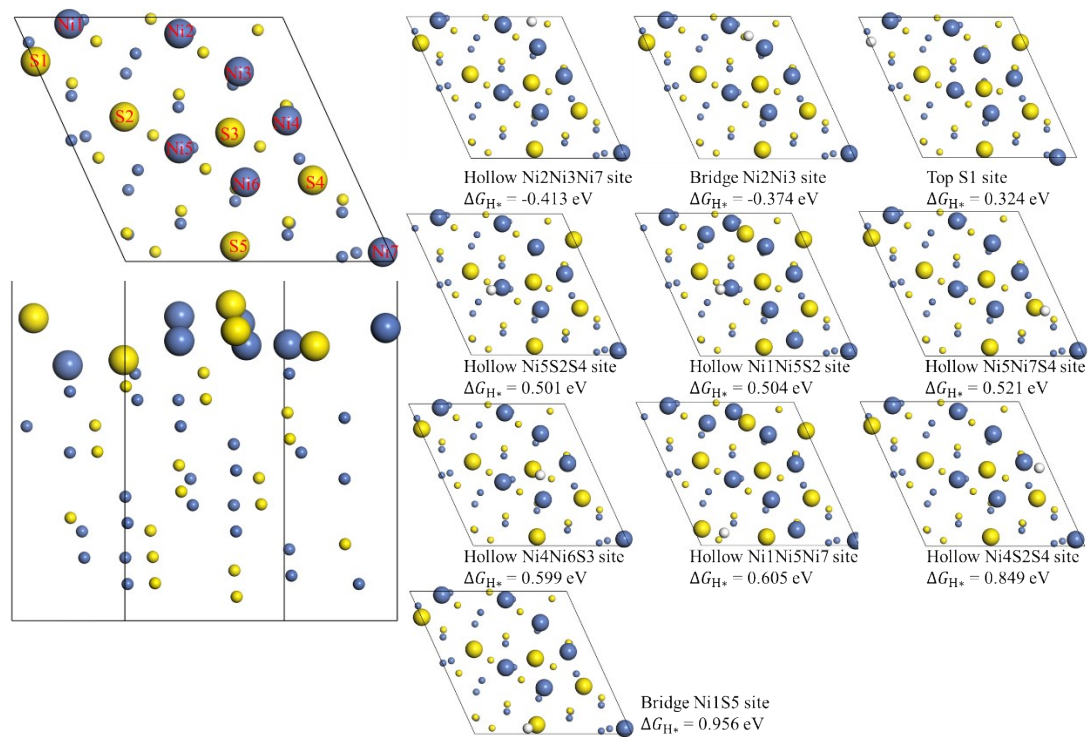

Fig. S12 The details of sites information of (1121)A of  $\text{Ni}_3\text{S}_2$ .

**Table S6** The details of Volmer-Heyrovsky process of (1121)A of Ni<sub>3</sub>S<sub>2</sub>.

| Site before relaxation | Site after relaxation | $\Delta G_{H^*}$ (eV) |
|------------------------|-----------------------|-----------------------|
| Top S1                 | Top S1                | 0.32416               |
| Top S5                 | Bridge Ni1S5          | 0.95564               |
| Top Ni2                | Bridge Ni2Ni3         | -0.37374              |
| Top Ni1                | Hollow Ni1Ni5Ni7      | 0.60532               |
| Top Ni5                | Hollow Ni1Ni5S2       | 0.50377               |
| Top Ni7                | Hollow Ni2Ni3Ni7      | -0.41345              |
| Top Ni6                | Hollow Ni4Ni6S3       | 0.59948               |
| Top Ni4                | Hollow Ni4S2S4        | 0.84930               |
| Top S4                 | Hollow Ni5Ni7S4       | 0.52108               |
| Top S2                 | Hollow Ni5S2S4        | 0.50073               |

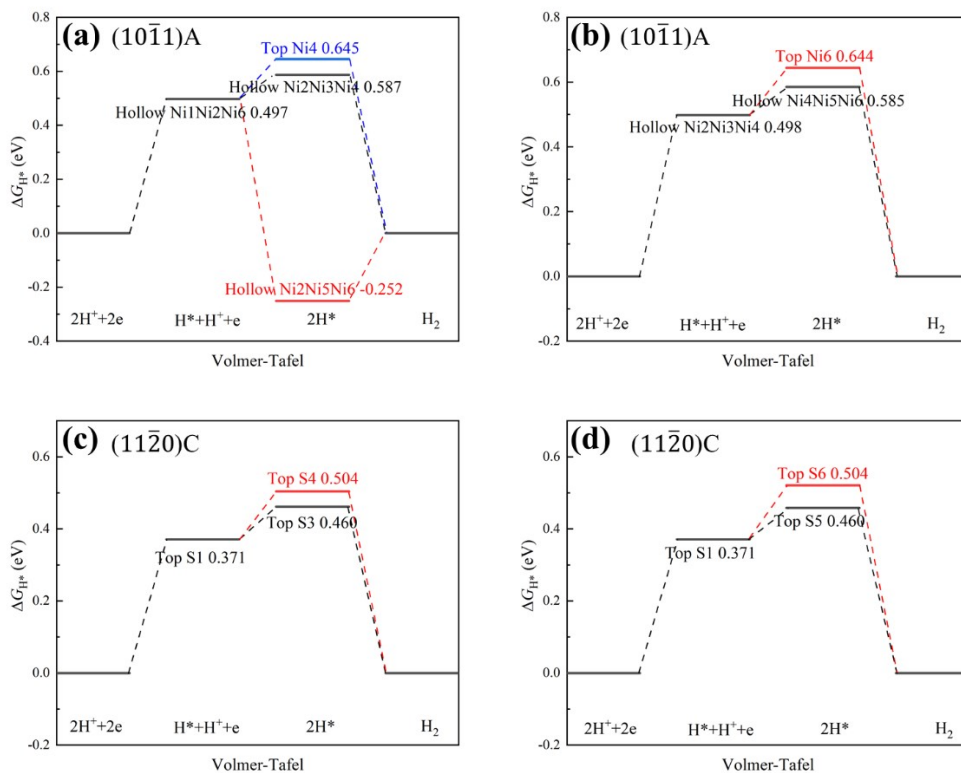

**Fig. S13** The adsorption of two hydrogen atoms on (a, b) (1011)A and (c, d) (1020)C surfaces of Ni<sub>3</sub>S<sub>2</sub>.

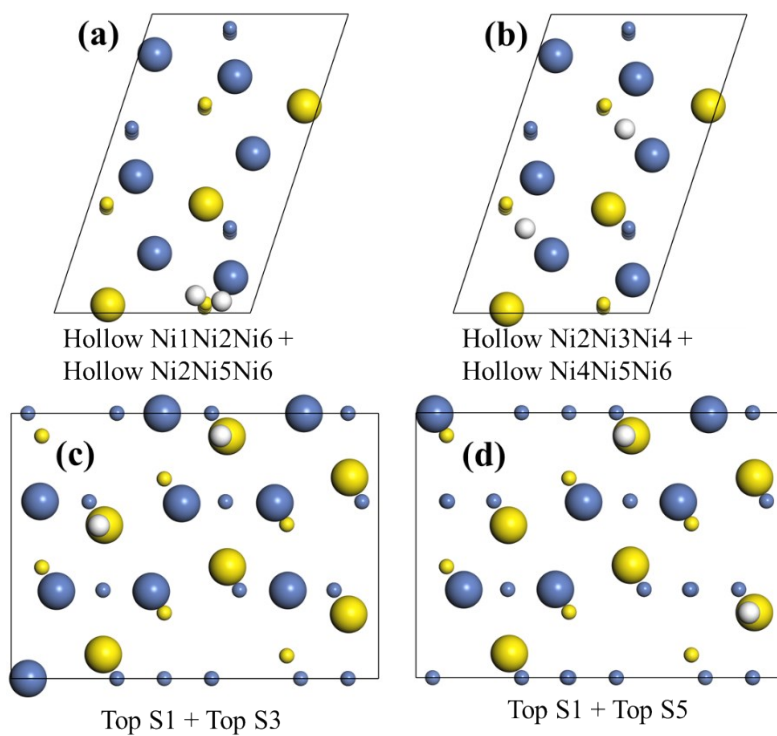

**Fig. S14** The most stable sites for the adsorption of two hydrogen atoms for  $(10\bar{1}1)_A$  and  $(11\bar{2}0)_C$  of  $\text{Ni}_3\text{S}_2$ .

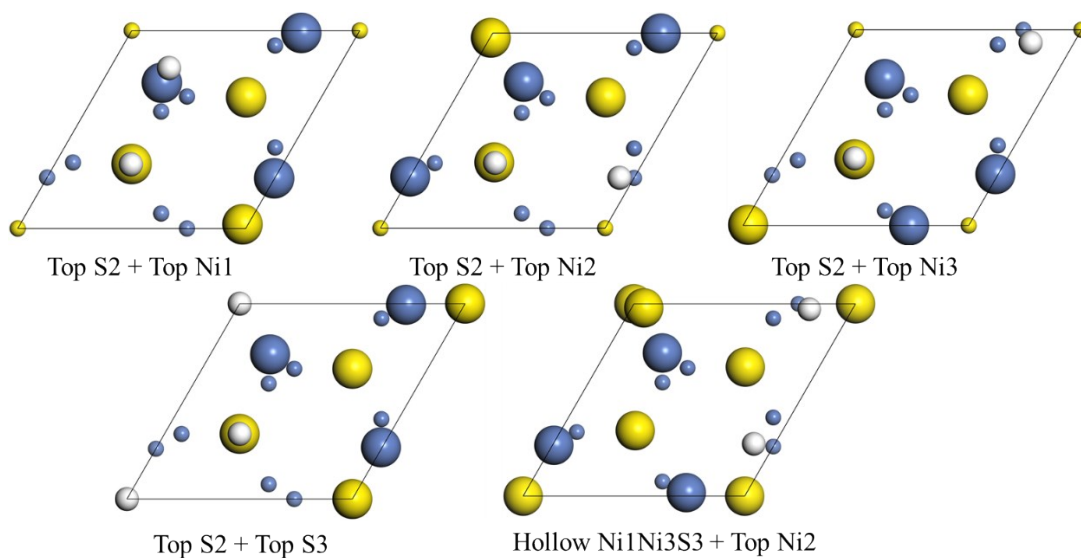

**Fig. S15** The stable sites for the adsorption of two hydrogen atoms for  $(0001)_A$  of  $\text{Ni}_3\text{S}_2$  with Top S2 site or Hollow Ni1Ni3S3 site as the first hydrogen atom adsorption site.



**Table S7** The details of the sites information of two hydrogen atoms for (0001)A of Ni<sub>3</sub>S<sub>2</sub> with Top S2 or Hollow Ni1Ni3S3 as the first hydrogen atom adsorption site.

| <b>First site</b>  | <b><math>\Delta G_{H^*}</math> (eV)<br/>(first)</b> | <b>Second<br/>site</b> | <b><math>\Delta G_{H^*}</math> (eV)<br/>(second)</b> | <b>Preferrable HER<br/>mechanism</b> |
|--------------------|-----------------------------------------------------|------------------------|------------------------------------------------------|--------------------------------------|
| Top S2             | -0.143                                              | Top Ni1                | 0.567                                                | Volmer-Heyrovsky                     |
| Top S2             | -0.143                                              | Top Ni2                | 0.568                                                | Volmer-Heyrovsky                     |
| Top S2             | -0.143                                              | Top Ni3                | 0.568                                                | Volmer-Heyrovsky                     |
| Top S2             | -0.143                                              | Top S3                 | 1.042                                                | Volmer-Heyrovsky                     |
| Hollow<br>Ni1Ni3S3 | 0.515                                               | Top Ni2                | 0.923                                                | Volmer-Heyrovsky                     |

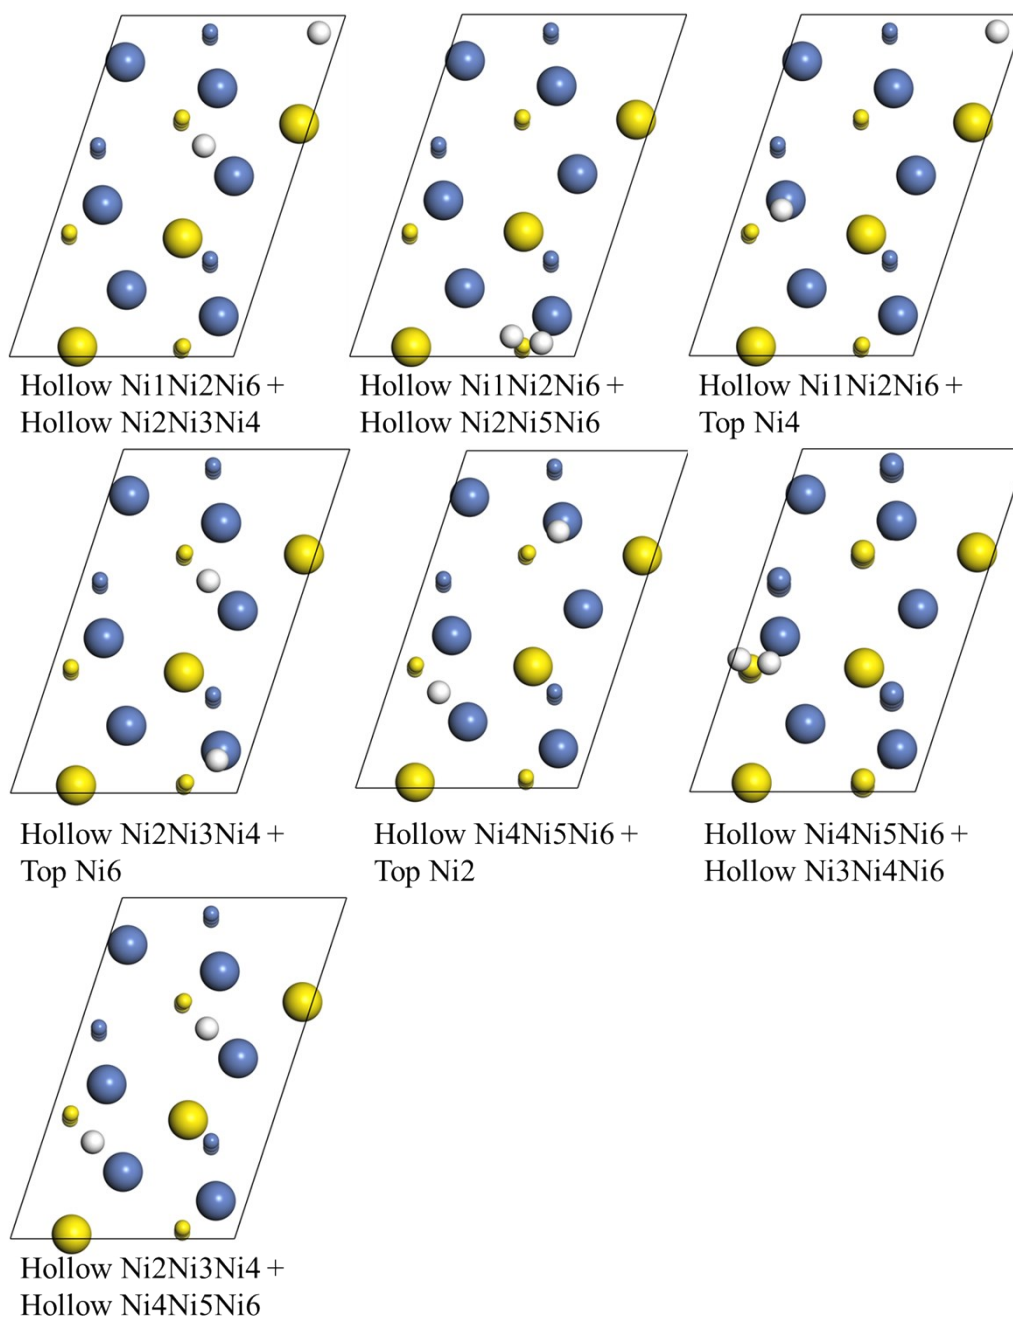

**Fig. S16** The stable sites for the adsorption of two hydrogen atoms for  $(10\bar{1}1)_A$  of  $\text{Ni}_3\text{S}_2$  with Hollow Ni1Ni2Ni6 site, Hollow Ni2Ni3Ni4 site or Hollow Ni4Ni5Ni6 site as the first hydrogen atom adsorption site.

**Table S8** The details of the sites information of two hydrogen atoms for (10 $\bar{1}1$ )A of Ni<sub>3</sub>S<sub>2</sub> with Hollow Ni1Ni2Ni6 site, Hollow Ni2Ni3Ni4 site or Hollow Ni4Ni5Ni6 site as the first hydrogen atom adsorption site.

| First site       | $\Delta G_{H^*}$ (eV)<br>(first) | Second site      | $\Delta G_{H^*}$ (eV)<br>(second) | Preferrable HER<br>mechanism |
|------------------|----------------------------------|------------------|-----------------------------------|------------------------------|
| Hollow Ni1Ni2Ni6 | 0.497                            | Hollow Ni2Ni3Ni4 | 0.587                             | Volmer-Heyrovsky             |
| Hollow Ni1Ni2Ni6 | 0.497                            | Hollow Ni2Ni5Ni6 | -0.252                            | Volmer-Tafel                 |
| Hollow Ni1Ni2Ni6 | 0.497                            | Top Ni4          | 0.645                             | Volmer-Heyrovsky             |
| Hollow Ni2Ni3Ni4 | 0.498                            | Hollow Ni4Ni5Ni6 | 0.585                             | Volmer-Heyrovsky             |
| Hollow Ni2Ni3Ni4 | 0.498                            | Top Ni6          | 0.644                             | Volmer-Heyrovsky             |
| Hollow Ni4Ni5Ni6 | 0.499                            | Top Ni2          | 0.644                             | Volmer-Heyrovsky             |
| Hollow Ni4Ni5Ni6 | 0.499                            | Hollow Ni3Ni4Ni6 | -0.253                            | Volmer-Tafel                 |

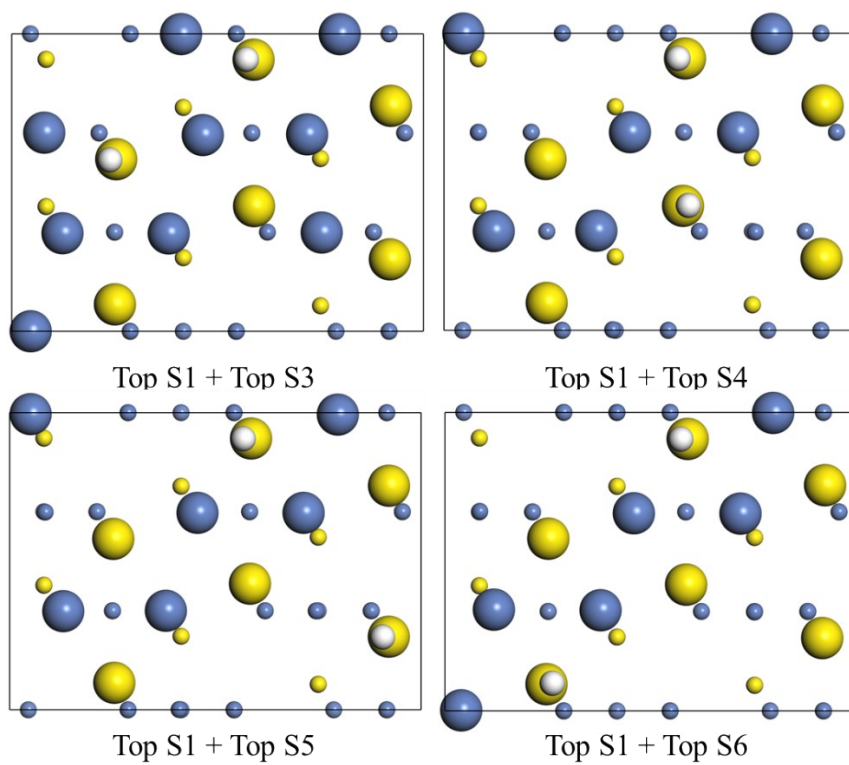

**Fig. S17** The stable sites for the adsorption of two hydrogen atoms for  $(11\bar{2}0)\text{C}$  of  $\text{Ni}_3\text{S}_2$  with Top S1 site as the first hydrogen atom adsorption site.

**Table S9** The details of the sites information of two hydrogen atoms for (1120)C of Ni<sub>3</sub>S<sub>2</sub> with Top S1 site as the first hydrogen atom adsorption site.

| <b>First site</b> | <b><math>\Delta G_{H^*}</math> (eV)<br/>(first)</b> | <b>Second site</b> | <b><math>\Delta G_{H^*}</math> (eV)<br/>(second)</b> | <b>Preferrable HER mechanism</b> |
|-------------------|-----------------------------------------------------|--------------------|------------------------------------------------------|----------------------------------|
| Top S1            | 0.371                                               | Top S3             | 0.460                                                | Volmer-Heyrovsky                 |
| Top S1            | 0.371                                               | Top S3             | 0.460                                                | Volmer-Heyrovsky                 |
| Top S1            | 0.371                                               | Top S4             | 0.504                                                | Volmer-Heyrovsky                 |
| Top S1            | 0.371                                               | Top S5             | 0.459                                                | Volmer-Heyrovsky                 |
| Top S1            | 0.371                                               | Top S6             | 0.521                                                | Volmer-Heyrovsky                 |

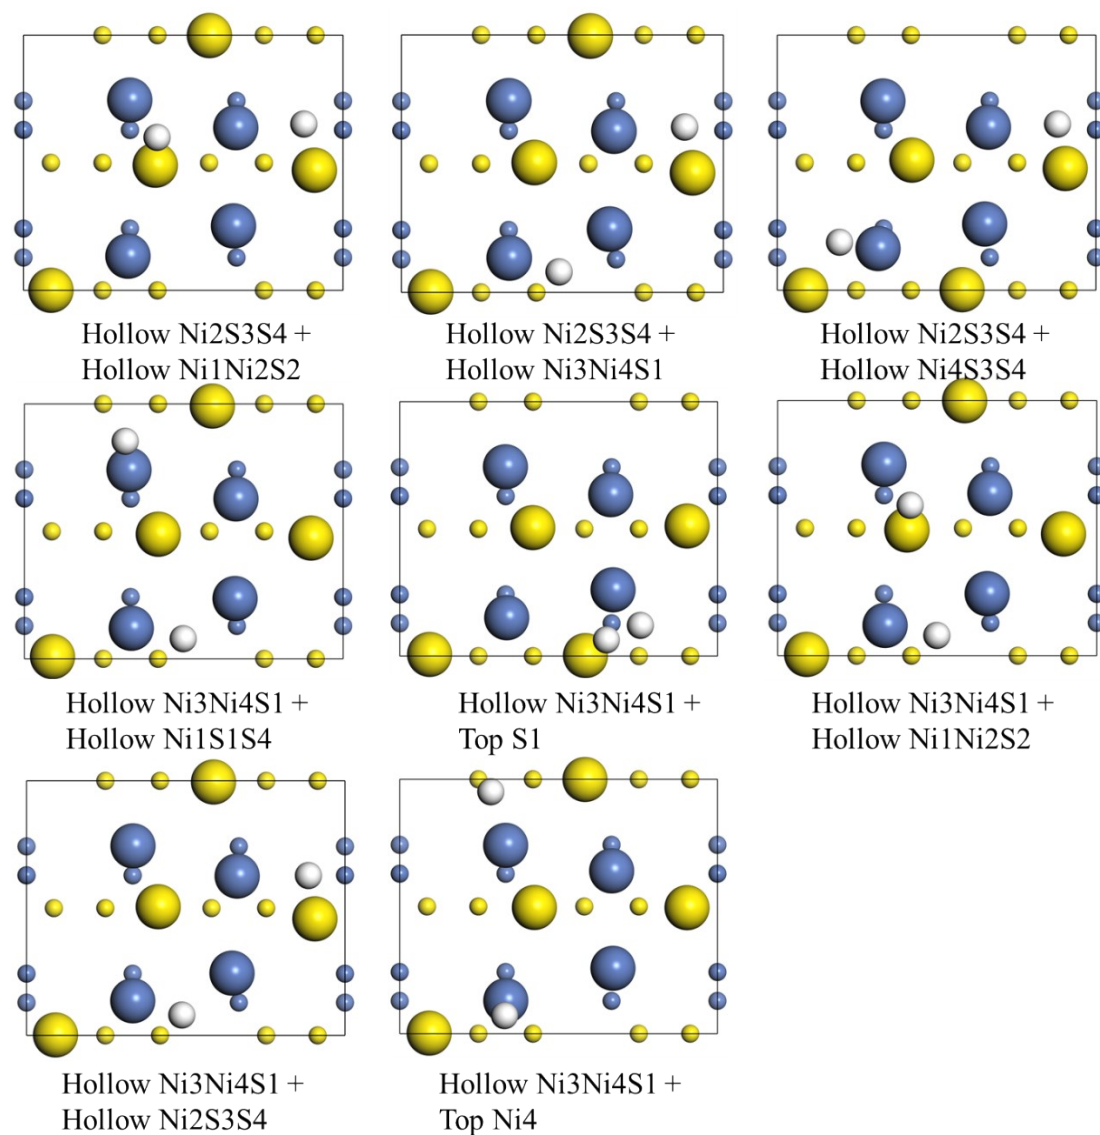

**Fig. S18** The stable sites for the adsorption of two hydrogen atoms for  $(10\bar{1}0)_C$  of  $\text{Ni}_3\text{S}_2$  with Hollow Ni2S3S4 site or Hollow Ni3Ni4S1 site as the first hydrogen atom adsorption site.

**Table S10** The details of the sites information of two hydrogen atoms for (10<sup>10</sup>)C of Ni<sub>3</sub>S<sub>2</sub> with Hollow Ni<sub>2</sub>S<sub>3</sub>S<sub>4</sub> site or Hollow Ni<sub>3</sub>Ni<sub>4</sub>S<sub>1</sub> site as the first hydrogen atom adsorption site.

| First site                                            | $\Delta G_{H^*}$ (eV)<br>(first) | Second site                                           | $\Delta G_{H^*}$ (eV)<br>(second) | Preferrable HER<br>mechanism |
|-------------------------------------------------------|----------------------------------|-------------------------------------------------------|-----------------------------------|------------------------------|
| Hollow Ni <sub>2</sub> S <sub>3</sub> S <sub>4</sub>  | 0.122                            | Hollow Ni <sub>1</sub> Ni <sub>2</sub> S <sub>2</sub> | 0.637                             | Volmer-Heyrovsky             |
| Hollow Ni <sub>2</sub> S <sub>3</sub> S <sub>4</sub>  | 0.122                            | Hollow Ni <sub>3</sub> Ni <sub>4</sub> S <sub>1</sub> | 0.168                             | Volmer-Heyrovsky             |
| Hollow Ni <sub>2</sub> S <sub>3</sub> S <sub>4</sub>  | 0.122                            | Hollow Ni <sub>4</sub> S <sub>3</sub> S <sub>4</sub>  | 0.563                             | Volmer-Heyrovsky             |
| Hollow Ni <sub>3</sub> Ni <sub>4</sub> S <sub>1</sub> | 0.254                            | Hollow Ni <sub>1</sub> S <sub>1</sub> S <sub>4</sub>  | 0.517                             | Volmer-Heyrovsky             |
| Hollow Ni <sub>3</sub> Ni <sub>4</sub> S <sub>1</sub> | 0.254                            | Top S1                                                | 0.149                             | Volmer-Tafel                 |
| Hollow Ni <sub>3</sub> Ni <sub>4</sub> S <sub>1</sub> | 0.254                            | Hollow Ni <sub>1</sub> Ni <sub>2</sub> S <sub>2</sub> | 0.374                             | Volmer-Heyrovsky             |
| Hollow Ni <sub>3</sub> Ni <sub>4</sub> S <sub>1</sub> | 0.254                            | Hollow Ni <sub>2</sub> S <sub>3</sub> S <sub>4</sub>  | 0.038                             | Volmer-Tafel                 |
| Hollow Ni <sub>3</sub> Ni <sub>4</sub> S <sub>1</sub> | 0.254                            | Top Ni <sub>4</sub>                                   | 0.030                             | Volmer-Tafel                 |



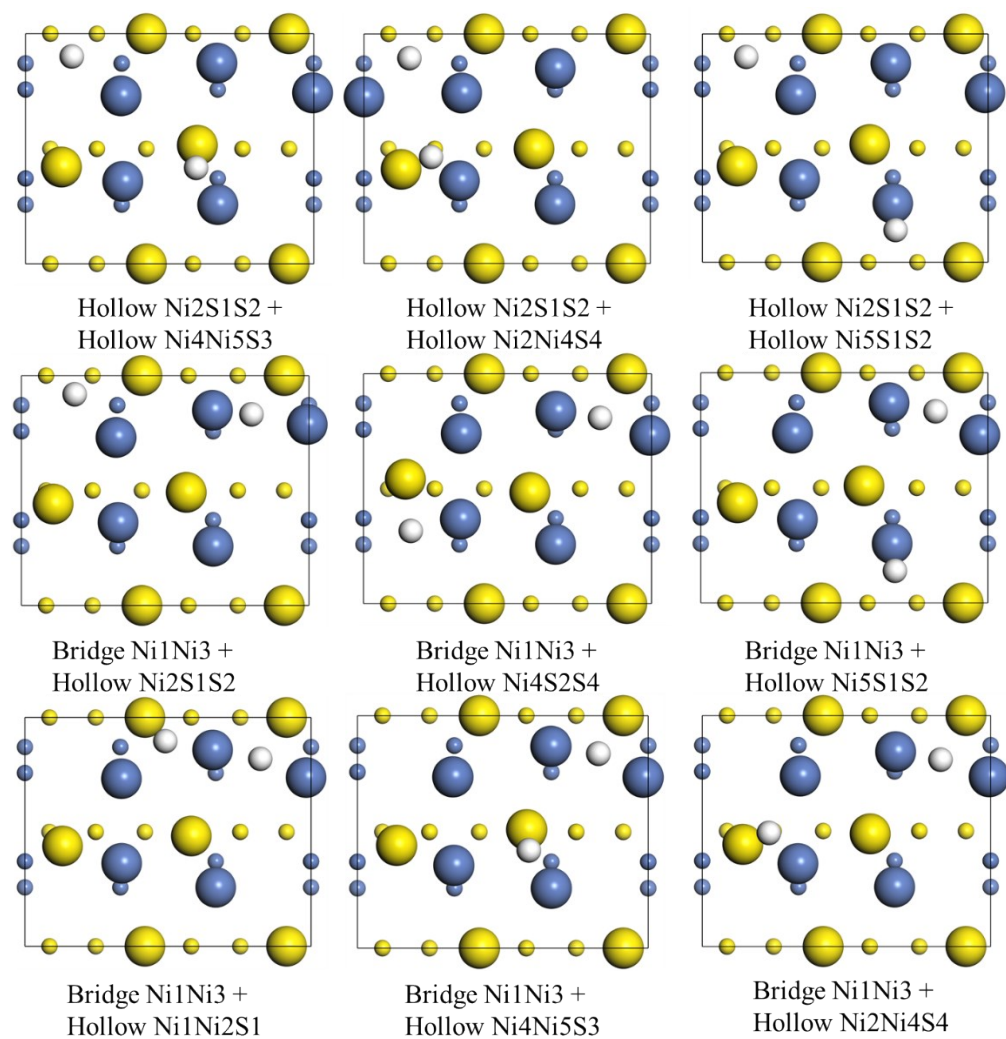

**Fig. S19** The stable sites for the adsorption of two hydrogen atoms for  $(10\bar{1}0)_B$  of  $\text{Ni}_3\text{S}_2$  with Hollow Ni2S1S2 site or Bridge Ni1Ni3 site as the first hydrogen atom adsorption site.

**Table S11** The details of the sites information of two hydrogen atoms for (10<sup>10</sup>)B of Ni<sub>3</sub>S<sub>2</sub> with Hollow Ni<sub>2</sub>S<sub>1</sub>S<sub>2</sub> site or Bridge Ni<sub>1</sub>Ni<sub>3</sub> site as the first hydrogen atom adsorption site.

| First site                                              | $\Delta G_{H^*}$ (eV)<br>(first) | Second site                                              | $\Delta G_{H^*}$ (eV)<br>(second) | Preferrable HER<br>mechanism |
|---------------------------------------------------------|----------------------------------|----------------------------------------------------------|-----------------------------------|------------------------------|
| Hollow<br>Ni <sub>2</sub> S <sub>1</sub> S <sub>2</sub> | -0.112                           | Hollow<br>Ni <sub>4</sub> Ni <sub>5</sub> S <sub>3</sub> | 0.523                             | Volmer-Heyrovsky             |
| Hollow<br>Ni <sub>2</sub> S <sub>1</sub> S <sub>2</sub> | -0.112                           | Hollow<br>Ni <sub>2</sub> Ni <sub>4</sub> S <sub>4</sub> | 0.668                             | Volmer-Heyrovsky             |
| Hollow<br>Ni <sub>2</sub> S <sub>1</sub> S <sub>2</sub> | -0.112                           | Hollow<br>Ni <sub>5</sub> S <sub>1</sub> S <sub>2</sub>  | 0.671                             | Volmer-Heyrovsky             |
| Hollow<br>Ni <sub>2</sub> S <sub>1</sub> S <sub>2</sub> | -0.112                           | Hollow<br>Ni <sub>4</sub> Ni <sub>5</sub> S <sub>3</sub> | 0.523                             | Volmer-Heyrovsky             |
| Hollow<br>Ni <sub>2</sub> S <sub>1</sub> S <sub>2</sub> | -0.112                           | Hollow<br>Ni <sub>2</sub> Ni <sub>4</sub> S <sub>4</sub> | 0.668                             | Volmer-Heyrovsky             |
| Bridge<br>Ni <sub>1</sub> Ni <sub>3</sub>               | 0.012                            | Hollow<br>Ni <sub>2</sub> S <sub>1</sub> S <sub>2</sub>  | -0.155                            | Volmer-Tafel                 |
| Bridge<br>Ni <sub>1</sub> Ni <sub>3</sub>               | 0.012                            | Hollow<br>Ni <sub>4</sub> S <sub>2</sub> S <sub>4</sub>  | 0.572                             | Volmer-Heyrovsky             |
| Bridge<br>Ni <sub>1</sub> Ni <sub>3</sub>               | 0.012                            | Hollow<br>Ni <sub>5</sub> S <sub>1</sub> S <sub>2</sub>  | 0.706                             | Volmer-Heyrovsky             |
| Bridge<br>Ni <sub>1</sub> Ni <sub>3</sub>               | 0.012                            | Hollow<br>Ni <sub>1</sub> Ni <sub>2</sub> S <sub>1</sub> | 0.311                             | Volmer-Heyrovsky             |
| Bridge<br>Ni <sub>1</sub> Ni <sub>3</sub>               | 0.012                            | Hollow<br>Ni <sub>2</sub> S <sub>1</sub> S <sub>2</sub>  | -0.157                            | Volmer-Tafel                 |
| Bridge<br>Ni <sub>1</sub> Ni <sub>3</sub>               | 0.012                            | Hollow<br>Ni <sub>4</sub> Ni <sub>5</sub> S <sub>3</sub> | 0.564                             | Volmer-Heyrovsky             |
| Bridge<br>Ni <sub>1</sub> Ni <sub>3</sub>               | 0.012                            | Hollow<br>Ni <sub>2</sub> Ni <sub>4</sub> S <sub>4</sub> | 0.583                             | Volmer-Heyrovsky             |

Zhang Bo et. *Physical Chemistry Chemical Physics*. Fig. S20.

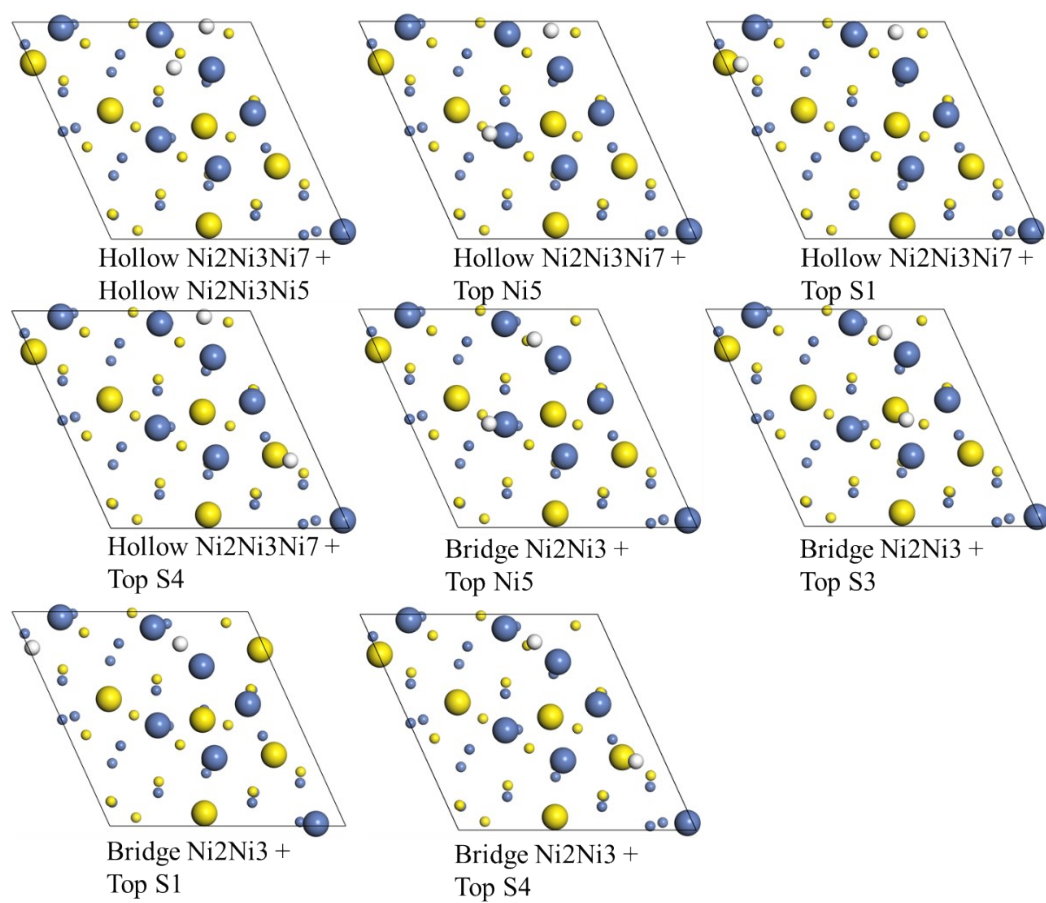

**Fig. S20** The stable sites for the adsorption of two hydrogen atoms for  $(11\bar{2}1)A$  of  $Ni_3S_2$  with Hollow Ni2Ni3Ni7 site or Bridge Ni2Ni3 site as the first hydrogen atom adsorption site.

**Table S12** The details of the sites information of two hydrogen atoms for (1121)A of Ni<sub>3</sub>S<sub>2</sub> with Hollow Ni<sub>2</sub>Ni<sub>3</sub>Ni<sub>7</sub> site or Bridge Ni<sub>2</sub>Ni<sub>3</sub> site as the first hydrogen atom adsorption site.

| First site                                             | $\Delta G_{H^*}$ (eV)<br>(first) | Second site                                            | $\Delta G_{H^*}$ (eV)<br>(second) | Preferrable HER<br>mechanism |
|--------------------------------------------------------|----------------------------------|--------------------------------------------------------|-----------------------------------|------------------------------|
| Hollow Ni <sub>2</sub> Ni <sub>3</sub> Ni <sub>7</sub> | -0.413                           | Hollow Ni <sub>2</sub> Ni <sub>3</sub> Ni <sub>5</sub> | -0.036                            | Volmer-Heyrovsky             |
| Hollow Ni <sub>2</sub> Ni <sub>3</sub> Ni <sub>7</sub> | -0.413                           | Top Ni5                                                | 0.473                             | Volmer-Heyrovsky             |
| Hollow Ni <sub>2</sub> Ni <sub>3</sub> Ni <sub>7</sub> | -0.413                           | Top S1                                                 | 0.435                             | Volmer-Heyrovsky             |
| Hollow Ni <sub>2</sub> Ni <sub>3</sub> Ni <sub>7</sub> | -0.413                           | Top Ni5                                                | 0.530                             | Volmer-Heyrovsky             |
| Hollow Ni <sub>2</sub> Ni <sub>3</sub> Ni <sub>7</sub> | -0.413                           | Top S4                                                 | 0.472                             | Volmer-Heyrovsky             |
| Bridge Ni <sub>2</sub> Ni <sub>3</sub>                 | -0.374                           | Hollow Ni <sub>2</sub> Ni <sub>3</sub> Ni <sub>5</sub> | -0.075                            | Volmer-Heyrovsky             |
| Bridge Ni <sub>2</sub> Ni <sub>3</sub>                 | -0.374                           | Top Ni5                                                | 0.513                             | Volmer-Heyrovsky             |
| Bridge Ni <sub>2</sub> Ni <sub>3</sub>                 | -0.374                           | Top S3                                                 | 0.561                             | Volmer-Heyrovsky             |
| Bridge Ni <sub>2</sub> Ni <sub>3</sub>                 | -0.374                           | Top Ni <sub>2</sub> Ni <sub>3</sub> Ni <sub>5</sub>    | -0.075                            | Volmer-Heyrovsky             |
| Bridge Ni <sub>2</sub> Ni <sub>3</sub>                 | -0.374                           | Top S1                                                 | 0.292                             | Volmer-Heyrovsky             |
| Bridge Ni <sub>2</sub> Ni <sub>3</sub>                 | -0.374                           | Top Ni5                                                | 0.505                             | Volmer-Heyrovsky             |
| Bridge Ni <sub>2</sub> Ni <sub>3</sub>                 | -0.374                           | Top S4                                                 | 0.505                             | Volmer-Heyrovsky             |

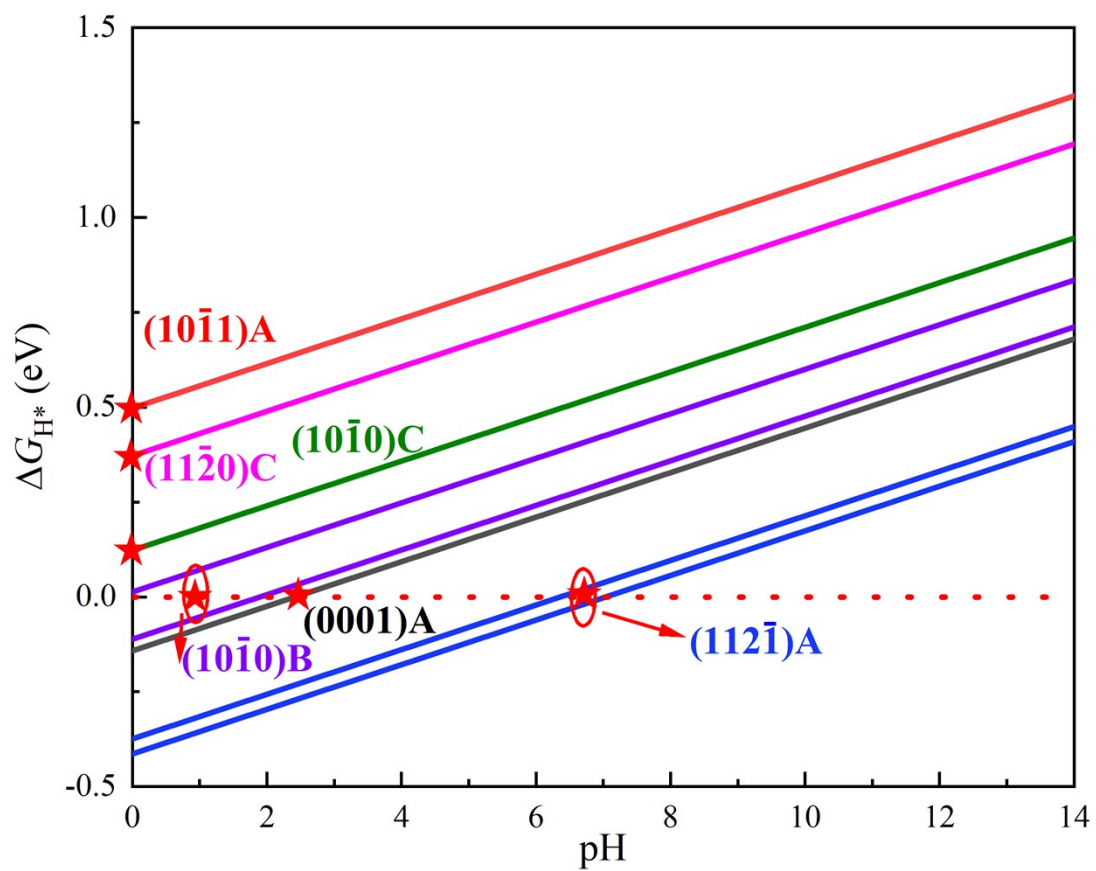

**Fig. S21** The pH effect of electrolyte on the HER performance of considered six relatively stable surfaces of  $Ni_3S_2$ .

## References

1. J. Hu, S. Zheng, X. Zhao, X. Yao and Z. Chen, *J. Mater. Chem. A*, 2018, **6**, 7827-7834.
